1

2

3

Food supplementation affects gut microbiota and immunological resistance

4

to parasites in a wild bird species

5

Sarah A. Knutie<sup>1,2</sup>

6

7 **Affiliations:**

8

<sup>1</sup>Department of Ecology and Evolutionary Biology, University of Connecticut, Storrs, CT,

9

06269, USA.

10

<sup>2</sup>Institute for Systems Genomics, University of Connecticut, Storrs, CT, 06269, USA.

11

12

Corresponding author: E-mail: [sarah.knutie@uconn.edu](mailto:sarah.knutie@uconn.edu)

13 **Abstract**

14 1. Supplemental feeding can increase the overall health of animals but also can have varying  
15 consequences for animals dealing with parasites. Furthermore, the mechanism mediating the  
16 effect of food supplementation on host-parasite interactions remains poorly understood.

17 2. The goal of the study was to determine the effect of food supplementation on host defenses  
18 against parasitic nest flies and whether host gut microbiota, which can affect immunity,  
19 potentially mediates these relationships. In a fully crossed design, I experimentally manipulated  
20 the abundance of parasitic nest flies (*Protophthora sialia*) and food availability then  
21 characterized the gut microbiota, immune responses, and nest parasite abundance of nestling  
22 eastern bluebirds (*Sialia sialis*).

23 3. Food supplemented birds had 75% fewer parasites than unsupplemented birds. Parasite  
24 abundance decreased throughout the breeding season for unsupplemented birds, but abundance  
25 did not change throughout the season for supplemented birds. Food supplementation increased  
26 overall fledging success. Parasitism had a sublethal effects on blood loss, but food  
27 supplementation mitigated these effects by increasing parasite resistance via the nestling IgY  
28 antibody response.

29 4. Food supplementation increased the gut bacterial diversity in nestlings, which was negatively  
30 related to parasite abundance. Food supplementation also increased the relative abundance of  
31 *Clostridium* spp. in nestlings, which was positively related to their antibody response and  
32 negatively related to parasite abundance.

33 5. *Synthesis and applications.* Overall, these results suggest that food supplementation,  
34 especially early in the breeding season, increases resistance to parasitism during the early life  
35 stage of the host, which could be mediated by the effect of supplementation on the gut

36 microbiota. Wildlife food supplementation is a common pastime for humans worldwide and  
37 therefore it is important to determine the consequences of this activity on animal health.  
38 Furthermore, supplemental feeding could induce resistance to detrimental parasites (e.g. invasive  
39 parasites) in hosts when management of the parasite is not immediately possible.

40 **Keywords:** bird feeding, blowfly, diet, food supplementation, host defenses, microbiome,  
41 resistance, tolerance

42

## 43 1 | INTRODUCTION

44 Environmental factors, such as food availability, can influence host-parasite interactions  
45 (Becker, Streicker & Altizer 2015; Becker *et al.* 2018; Sánchez *et al.* 2018). Host defense  
46 strategies against parasites, such as tolerance and resistance, are often condition-dependent and  
47 regulated by resource availability (Lee *et al.* 2006; Cotter *et al.* 2011; Sternberg *et al.* 2012;  
48 Howick & Lazzaro 2014; Knutie *et al.* 2017c). Tolerance mechanisms, such as tissue repair or  
49 compensation for energy loss, reduce the damage that parasites cause without reducing parasite  
50 fitness (Miller, White & Boots 2006; Råberg, Sim & Read 2007; Read, Graham & Råberg 2008;  
51 Medzhitov, Schneider & Soares 2012). For example, avian parents from parasite-infested nests  
52 reduce the cost of parasitism by feeding their offspring more than parents from non-parasitized  
53 nests (Christe *et al.* 1996; Tripet and Richner 1997; Knutie *et al.* 2016). Consequently, despite  
54 increasing parasite loads, offspring do not suffer a high cost of parasitism because they are able  
55 to compensate for resources lost to the parasites.

56 Another condition-dependent defense mechanism is resistance, such as the immune  
57 response, which reduces the damage that parasites cause by reducing parasite fitness (Read *et al.*  
58 2008). Resistance can be condition-dependent because mounting immune responses can be  
59 energetically costly and therefore only hosts with enough food resources may be able to invest in  
60 immunity (Sheldon & Verhulst 1996; Svensson *et al.* 1998; Lochmiller & Deerenberg 2000;  
61 Demas 2004; Sternberg *et al.* 2012; Howick & Lazzaro 2014; Cornet *et al.* 2014). One  
62 explanation for the positive relationship between food availability and immunity is that the extra  
63 nutrients directly increase the production of immune cells (Strandin, Babayan & Forbes 2018).  
64 For example, supplemented protein can increase the concentration of cellular immune cells (e.g.

65 eosinophils, globule leukocytes and mast cells) (reviewed in Coop and Kyriazakis 2001) and  
66 humoral immune cells (e.g. Ig antibodies) (Datta *et al.* 1998).

67 Food availability might also indirectly influence resistance by affecting the gut  
68 microbiota of the host. Host diet composition can directly alter the gut microbiota of the host  
69 (David *et al.* 2014; Carmody *et al.* 2015). For example, hosts that consume a plant-based diet  
70 have significantly different bacterial communities than hosts that consume an animal-based diet  
71 (David *et al.* 2014; Knutie *et al.* 2017a). Since the gut microbiota can affect the development and  
72 maintenance of the immune system of the host (reviewed in Round and Mazmanian 2009;  
73 Hooper *et al.* 2012), diet-based shifts in the host gut microbiota might also affect parasite  
74 resistance. However, studies are still needed to determine whether the host microbiota plays a  
75 role in mediating the effect of food availability on parasite resistance.

76 Humans can change resource availability for animals by increasing the abundance of  
77 unnatural food using wild bird feeders and the disposal of human trash (Murray *et al.* 2016;  
78 Bosse *et al.* 2017; Start *et al.* 2018). In fact, humans provide many wild bird species with a large  
79 proportion of their food (Jones & James Reynolds 2008; Jones 2011; Cox & Gaston 2018),  
80 which can play a key role in maximizing the birds' fitness (Tollington *et al.* 2019). In the United  
81 States alone, approximately 50 million households provide over a half a million tons of  
82 supplemental food to attract wild birds to their property (Robb *et al.* 2008; Cox & Gaston 2018).  
83 Supplemental feeding of birds can have several benefits to birds and humans. Feeding wild birds  
84 can improve the mental health of humans along with their connection with nature (Jones 2011;  
85 Cox & Gaston 2016, 2018; Cox *et al.* 2016; Shaw, Miller & Wescott 2017). Birds that are  
86 supplemented with food are often in better condition, which in turn can increase their  
87 reproductive success (Tollington *et al.* 2019) and enhance some measures of immunity

88 (Lochmiller, Vestey & Boren 1993; Wilcoxon *et al.* 2015; Ruhs, Vézina & Karasov 2018;  
89 Sánchez *et al.* 2018; Strandin *et al.* 2018). Because supplemental feeding can increase bird  
90 abundance (Fuller *et al.* 2008), it can also increase pathogen transmission by increasing host  
91 aggregation and contact at the feeders (Wilcoxon *et al.* 2015; Becker *et al.* 2015). Although  
92 correlational studies have variably linked food availability and host-parasite outcomes, causal  
93 tests are still needed to determine the effect of food supplementation on host-parasite interactions  
94 and how the host microbiota could be affecting parasite resistance (Becker *et al.* 2015; Altizer *et al.*  
95 *al.* 2018).

96         The eastern bluebird (*Sialia sialis*) is a North American bird species that is unnaturally  
97 fed by humans. In the 1970s, populations of eastern bluebirds declined, which was thought to be  
98 linked to a loss of suitable foraging and nesting habitat (Gowaty & Plissner 2015). In response,  
99 humans built and established artificial nest boxes and started supplementing the birds' natural  
100 diet of insects, spiders, and small fruits (Pinkowski 1977a) with mealworms. Since the 1970s, the  
101 eastern bluebird population size has rebounded (Sauer & Droege 1990) but humans continue to  
102 maintain nest boxes and provide bluebirds with supplemental food, such as mealworms.  
103 Bluebirds are also infested with parasitic nest flies (*Protocalliphora* sp.) throughout their range.  
104 Past studies have found highly variable blowfly abundances along with both a negative and no  
105 effect of blowflies on fledging success of bluebirds (Johnson 1929; Pinkowski 1977b; Roby,  
106 Brink & Whitmann 1992; Wittmann & Beason 1992; Smar 1996; Hannam 2006). One  
107 explanation for the variable parasite load and relationship between bluebirds and their parasites  
108 is that the bluebird populations have access to different resources (natural and supplemental),  
109 which in turn, could affect their ability to defend themselves.

110           The goal of this study was to determine the effect of food supplementation on host  
111 defenses against parasites, whether these effects differ across the breeding season, and whether  
112 the gut microbiota of the host could be mediating the effect of food on host defense  
113 strategies. Across the breeding season, I experimentally manipulated parasite abundance and  
114 food availability (by supplementing birds with mealworms (*Tenebrio molitor*) or not) then  
115 quantified growth, hemoglobin levels (proxy of blood loss), glucose levels (proxy of energy),  
116 and survival (fledging success) of nestling bluebirds. I also quantified the *Protocalliphora*-  
117 binding antibody response, as a measure of resistance, and the gut microbiota of nestlings.

118           Bluebird nestlings are naturally tolerant of *Protocalliphora sialia* in relation to growth  
119 and survival but suffered sublethal effects (blood loss) from the parasite (Grab *et al.* 2019). If  
120 food supplementation supports host tolerance without affecting resistance, then parasitized birds  
121 that are supplemented will maintain good health (i.e. growth, survival) without changes in their  
122 parasite load. However, because food supplementation can enhance the immune response of  
123 birds (Strandin *et al.* 2018), birds with supplemented food are predicted to shift their host  
124 defense strategy from tolerance to resistance in order to reduce the sublethal effect of the parasite  
125 on blood loss. Therefore, I predicted that food supplementation would reduce parasite load in the  
126 naturally parasitized control nests. Because insect (food) availability can increase throughout  
127 breeding season (Bowlin & Winkler 2004), I predicted that supplementation would be less  
128 effective at reducing parasite abundance later in the breeding season.

129           Food supplementation could either directly or indirectly increase host resistance to  
130 parasitism. More nutrients could provide additional resources to directly speed up immune  
131 system development, such as the IgY antibody response or haptoglobin production, in nestlings.  
132 When a host is bitten by an ectoparasite, a series of immune pathways is activated by the host to

133 induce an inflammatory response that acts to prevent or reduce feeding by the ectoparasite  
134 (reviewed in Owen, Nelson & Clayton 2010). Briefly, tissue damage and the introduction of  
135 antigens from the parasite stimulate the release of pro-inflammatory cytokines, which can  
136 produce acute phase proteins (e.g. haptoglobins). These chemical substances signal cells of the  
137 innate immune system, such as macrophages, to travel to the damaged tissue to degrade antigens  
138 and cells of the adaptive immune response induce the production of antigen-specific antibodies  
139 (e.g. IgY antibodies), which form lasting memory cells that can be activated quickly when the  
140 host is re-exposed to the parasite (antigen). The immune cascade described above can negatively  
141 affect ectoparasites by causing edema (tissue swelling), which prevents the parasites from  
142 feeding from capillaries, and can damage the parasite's tissue with proteolytic molecules.  
143 Consequently, these actions can reduce the fitness of the parasite by reducing blood meal size  
144 (Owen *et al.* 2009). However, an immune response can be energetically costly to produce and  
145 therefore only well-fed nestlings might be able to produce this response (Sheldon & Verhulst  
146 1996; Lochmiller & Deerenberg 2000; Cornet *et al.* 2014).

147         Alternatively, diet can affect the gut microbiota (e.g. particular taxa) of the host (Knutie  
148 *et al.* 2017a), which could impact parasite resistance. Therefore, I predicted that food  
149 supplementation would increase the gut bacterial diversity of the nestlings, which would be  
150 positively correlated with the immune responses and negatively correlated with parasite  
151 abundance. Additionally, a particular species of symbiont (e.g. gut bacterial pathogens) could  
152 affect another species due to its earlier arrival by modulating the immune response (Sousa 1992;  
153 de Roode *et al.* 2005; Devevey *et al.* 2015). Therefore, I also explored the relationship between  
154 ectoparasite abundance and the relative abundance of bacterial genera that included avian  
155 pathogens, such as *Campylobacter spp.*, *Clostridium spp.*, *Enterococcus spp.*, *Escherichia spp.*,



156 *Lactobacillus spp.*, *Listeria spp.*, *Mycobacteria spp.*, *Pasteurella spp.*, *Salmonella spp.*,  
157 *Staphylococcus spp.*, *Streptococcus spp.*, and *Vibrios spp.* (reviewed in Benskin *et al.* 2009).

158

## 159 **2 | MATERIAL AND METHODS**

### 160 **2.1 | Study system**

161 From May to July 2017, approximately 150 nest boxes were monitored in Clearwater and  
162 Hubbard County in Northern Minnesota, USA, near the University of Minnesota Itasca  
163 Biological Station and Itasca State Park (47°13'33" N, - 95°11'42" W). Eastern bluebirds are  
164 abundant at the site and nest in artificial cavities. *P. sialia* is the only ectoparasite that infests the  
165 nests of bluebirds at this site.

166

### 167 **2.2 | Experimental manipulation of parasites and food availability**

168 Parasite abundance and food availability were experimentally manipulated for each nest  
169 using a 2x2 factorial design. Boxes were checked once a week for nesting activity. Once eggs  
170 appeared, nests were checked every other day until nestlings hatched. When eggs were incubated  
171 for 10 days, mealworm feeders were placed 10 m from the nest box (Fig. S1), with the intention  
172 that the feeder would only provide food to the birds from this focal nest. The feeders were  
173 constructed from pine wood (2.54 cm by 10.16 cm) and the basin for the mealworms was an  
174 empty, sterilized aluminum cat food can. The can had pin sized holes in the bottom of the can to  
175 allow for drainage from the rain and the can was attached to the wood platform with Velcro. The  
176 feeders were attached to a green garden fence post with 18-gauge aluminum wire, approximately  
177 1.5m above the ground.

178           Nests were assigned to the mealworm-supplemented or non-supplemented treatment. For  
179 the supplemented treatment, 15 mealworms (Rainbow Mealworms, Compton, CA) per nestling  
180 per day were added to the feeders until the bird eggs hatched, which was based on the  
181 recommended feeding regime by the North American Bluebird Society. For the non-  
182 supplemented treatment, the feeders were visited daily but mealworms were not added to the  
183 feeders to control for the effect of disturbance on the birds. Parents were supplied with  
184 mealworms a few days before nestlings hatched to increase the chances that parents would find  
185 the feeders before their nestlings hatched. Birds were supplemented or not until nestlings reached  
186 10 days old.

187           Nests were also assigned to the parasitized or non-parasitized treatment when eggs  
188 hatched. The nestlings and top liner of the nest were removed in order to treat the nest with either  
189 water to allow for natural parasitism or a 1% permethrin solution (Permacap) to remove all  
190 parasites (Knutie *et al.* 2016; DeSimone *et al.* 2018). Nestlings never contacted the parasite  
191 treatment since the liquid was sprayed under the nest liner.

192

### 193 2.3 | *Nestling growth and survival*

194           Within two days of hatching, nestlings (g) were weighed using a portable digital scale  
195 balance and tarsus length (mm), bill length (mm), and first primary feather length (mm) were  
196 measured using dial calipers. When nestlings were ten days old, they were measured again and  
197 banded with a numbered metal band. When nestlings were approximately 13 days old, the boxes  
198 were checked every other day from a distance (to avoid pre-mature fledging) to determine the  
199 fledging success and age at which the nestlings fledged or died (>10-day old nestlings are not  
200 typically removed from the nest by the parents after they die, S.A.K. personal obs.).

## 201 2.4 | *Sample collection*

202 Feces and a small blood sample (<30  $\mu$ L) were collected from nestlings when they were  
203 10 days old. Hemoglobin was measured from whole blood using a HemoCue® HB +201  
204 portable analyzer and glucose was measured using a HemoCue® Glucose 201 portable analyzer.  
205 Blood samples were placed on ice until they were centrifuged for 3 minutes at 10000 rpm to  
206 separate the plasma from the red blood cells. Plasma and red blood cells were then stored  
207 separately in a -80°C freezer. Fecal samples were placed on ice until stored in a -80°C freezer.  
208 Samples were then transported on dry ice to the University of Connecticut. Enzyme-linked  
209 immunosorbent assays (ELISA) and Tridelta PHASE haptoglobin assay (TP-801) were then  
210 performed to quantify *P. sialia*-binding antibody (IgY) and haptoglobin (acute phase protein)  
211 levels, respectively, in the plasma of parasitized nestling. IgY antibody levels from  
212 unsupplemented nestlings were first published in (Grab *et al.* 2019); see this paper for the  
213 detailed protocol for the IgY ELISA.

214

## 215 2.5 | *Quantifying parasites*

216 Once nestlings died or fledged, nests were collected and stored in plastic bags. Within  
217 eight hours of collection, nests were dissected and all larvae, pupae, and pupal cases were  
218 counted to determine total parasite abundance for each nest. Eclosed flies were collected and  
219 identified as *Protocalliphora sialia*.

220

## 221 2.6 | *Bacterial DNA extraction and sequencing*

222 Total DNA was extracted from nestling bluebird feces from parasitized nests and three  
223 mealworms using a MoBio PowerFecal DNA Isolation Kit. DNA extractions were then sent to

224 the University of Connecticut Microbial Analysis, Resources and Services for sequencing with  
225 an Illumina MiSeq platform and v2 2x250 base pair kit (Illumina, Inc). A laboratory blank was  
226 also sequenced to control for kit contamination and found no detectable sequences. Bacterial  
227 inventories were conducted by amplifying the V4 region of the 16S rRNA gene using primers  
228 515F and 806R and with Illumina adapters and dual indices (Kozich *et al.* 2013). Raw sequences  
229 were demultiplexed with onboard bcl2fastq and then processed in Mothur v1.39.5 (Schloss *et al.*  
230 2009) according to the standard MiSeq protocol (Kozich *et al.* 2013). Briefly, forward and  
231 reverse sequences were merged. All sequences with any ambiguities, that did not align to the  
232 correct region, or that did not meet length expectations, were removed. Sequences were aligned  
233 to the Silva nr\_v119 alignment (Quast *et al.* 2013). Chimeric reads were also removed using  
234 UCHIME (Edgar *et al.* 2011). Non-bacterial sequences that classified as chloroplasts,  
235 mitochondria, or unknown (i.e. did not classify to the level of kingdom) were removed.  
236 Sequences were grouped into operational taxonomic units (OTUs) based on a 97% similarity  
237 level and identification of the OTUs was done using the Ribosomal Database Project Bayesian  
238 classifier (Wang *et al.* 2007) against the Silva nr\_v119 taxonomy database. Alpha (sobs,  
239 Shannon index, Simpson index) and beta diversity statistics were calculated by averaging 1,000  
240 random subsampling of 10,000 reads per sample. The resulting data sets included a total of  
241 702,648 sequences and an average of 41,332 reads per sample (min: 17,582, max: 57,283).

242

## 243 2.7 | *Statistical analyses*

244 A generalized linear model (GLM) with zero-inflated Poisson errors (to control for the  
245 number of zeros in the fumigated treatment) was used to determine whether parasite treatment,  
246 food treatment, and their interaction affected parasite abundance. Within the sham-fumigated

247 treatment, a negative binomial GLM was used to determine whether food supplementation,  
248 timing of breeding (Julian date), and their interaction affected parasite abundance.

249 A GLM with binomial errors for proportional data (i.e. logistic regression) was used to  
250 determine the effect of the food treatment, parasite treatment, and their interaction on fledging  
251 success. A GLM was also used to determine the effect of the interaction between the food  
252 treatment and parasite abundance on fledging success to test whether food treatment affected  
253 host tolerance of the parasite (Simms 2000); i.e. if the effect of the interaction on fledging  
254 success is significant then nestlings from each food treatment differ in parasite tolerance. Julian  
255 date was originally included as a covariate for the growth and fledging success models but it was  
256 excluded from all models because it did not account for a significant amount of variation.

257 Nestling growth metrics (bill length, tarsus length, first primary feather length, body  
258 mass) were not highly correlated (pairwise correlation coefficients ranged from 0.37 to 0.66;  
259 Table S1); therefore, individual generalized linear mixed models (GLMM) with nest as a random  
260 effect were used to determine the effect of parasite treatment, food treatment, and their  
261 interaction on each  $\log_{10}$  transformed nestling growth metrics. GLMMs with nest as a random  
262 effect were also used to determine the effect of parasite treatment, food treatment, and their  
263 interaction on  $\log_{10}$  transformed hemoglobin levels (proxy of blood loss) and glucose levels  
264 (proxy of energy levels).

265 Within the sham-fumigated treatment, GLMMs with nest as a random effect were used to  
266 determine the effect of food treatment on immune responses (antibody levels) and alpha bacterial  
267 diversity metrics (Shannon index and the  $\log_{10}$  of sobs and Simpson index). A GLM was used to  
268 analyze the effect of food treatment on haptoglobin levels because haptoglobin was measured in  
269 only one nestling per nest. Analyses were conducted using the glm (GLM) and glmer (GLMM)

270 functions with the lme4 package or glmmTMB (zero-inflated Poisson GLM) function with the  
271 glmmTMB package. Probability values were calculated using log-likelihood ratio tests using the  
272 Anova function in the car package (Fox & Weisberg 2002).

273 Microbiota data were also analyzed from mealworm samples and parasitized nestlings  
274 from both food treatments. The effect of food treatment on bacterial community dynamics in  
275 parasitized nestlings was analyzed with the Bray-Curtis Dissimilarity Matrices using  
276 PERMANOVA+ (2008, version 1.0.1; with 999 permutations) in PRIMER (2008, version  
277 6.1.11). Relative abundances (arcsine square root transformed; Shchipkova et al. 2010; Kumar et  
278 al. 2012) of bacterial phyla and genera of birds and mealworms were analyzed using ANOVAs  
279 with food treatment and mealworms as independent variables; false discovery rate (FDR) tests  
280 were used to control for multiple analyses and Tukey post-hoc tests were used for pairwise  
281 interactions. Relative abundances of six bacterial genera that include pathogenic species were  
282 also compared between food treatments ANOVAs with FDR corrections. Analyses were  
283 conducted in R (2017, version 3.4.3). All figures were created in Prism (2017, version 7).

284

### 285 **3 | RESULTS**

#### 286 *3.1 | Effect of treatment and timing of breeding on parasite abundance*

287 Fumigation of nests with permethrin was effective at reducing parasite abundance to zero  
288 (Fig. 1A) (Table S2) (GLM,  $\chi^2 = 29.83$ ,  $df = 1$ ,  $P < 0.0001$ ). Food supplementation and the  
289 interaction between food and parasite treatments also affected parasite abundance (Fig. 1A)  
290 (GLM, food:  $\chi^2 = 12.88$ ,  $df = 1$ ,  $P < 0.001$ ; interaction:  $\chi^2 = 9.37$ ,  $df = 1$ ,  $P = 0.002$ ). Food  
291 supplementation decreased parasite abundance within the sham-fumigated treatment: 100%  
292 (11/11) of unsupplemented nests and 55.6% (5/9) of supplemented were infested with parasites

293 and unsupplemented nests had, on average, four times as many parasites as supplemented nests  
294 (Fig. 1A). Overall, parasite abundance decreased with timing of breeding (Table S3) (Julian date:  
295  $\chi^2 = 0.20$ ,  $df = 1$ ,  $P = 0.66$ ) but more specifically, there was an interaction between food  
296 treatment and Julian date (interaction:  $\chi^2 = 4.18$ ,  $df = 1$ ,  $P = 0.04$ ); parasite abundance decreased  
297 throughout the season in unsupplemented nests, but not supplemented nests (Fig. 1B).

298

### 299 3.2 | *Fledging success and nestling growth*

300 Parasite and food treatment affected fledging success (GLM, parasite:  $\chi^2 = 4.09$ ,  $df =$   
301  $1$ ,  $P = 0.04$ ; food:  $\chi^2 = 6.78$ ,  $df = 1$ ,  $P = 0.009$ ), with sham-fumigated nests having higher  
302 fledging success than fumigated nests and supplemented nests having higher fledging success  
303 than unsupplemented nests (Fig. 1C). However, the interaction between parasite and food  
304 treatment did not affect fledging success ( $\chi^2 = 2.35$ ,  $df = 1$ ,  $P = 0.13$ ). The relationship between  
305 fledging success and parasite abundance did not differ across food treatments (Fig. 1D) (i.e.  
306 tolerance to parasitism did not differ;  $\chi^2 = 0.10$ ,  $df = 1$ ,  $P = 0.75$ ).

307 Parasite treatment, food treatment, and the interaction between the two factors did not  
308 significantly affect bill length (Tables 1 and S4) (GLMM, parasite:  $\chi^2 = 0.69$ ,  $df = 1$ ,  $P = 0.41$ ,  
309 food:  $\chi^2 = 0.99$ ,  $df = 1$ ,  $P = 0.32$ , interaction:  $\chi^2 = 0.23$ ,  $df = 1$ ,  $P = 0.63$ ). Parasite treatment had a  
310 marginally non-significant effect on tarsus length (GLMM, parasite:  $\chi^2 = 3.65$ ,  $df = 1$ ,  $P = 0.06$ ),  
311 but food treatment and the interaction between the treatments did not affect tarsus length (food:  
312  $\chi^2 = 0.99$ ,  $df = 1$ ,  $P = 0.32$ , interaction:  $\chi^2 = 0.72$ ,  $df = 1$ ,  $P = 0.40$ ). Food treatment affected  
313 nestling body mass and first primary feather length (mass:  $\chi^2 = 5.09$ ,  $df = 1$ ,  $P = 0.02$ ; feather:  $\chi^2$   
314  $= 3.36$ ,  $df = 1$ ,  $P = 0.07$ ) with unsupplemented nestlings having lower body mass and slower  
315 feather growth than supplemented nestlings (Table 1). Parasite treatment and the interaction

316 between parasite and food treatment did not affect body mass and first primary feather length  
317 (Table 1) (mass: parasite,  $\chi^2 = 0.04$ ,  $df = 1$ ,  $P = 0.83$ ; interaction,  $\chi^2 = 0.01$ ,  $df = 1$ ,  $P = 0.92$ ;  
318 feather: parasite,  $\chi^2 = 1.13$ ,  $df = 1$ ,  $P = 0.29$ ; interaction,  $\chi^2 = 0.38$ ,  $df = 1$ ,  $P = 0.54$ ).

319

### 320 3.3 | Nestling hemoglobin and glucose levels

321 Parasite treatment affected hemoglobin levels (Table S4) (GLMM,  $\chi^2 = 5.55$ ,  $df = 1$ ,  $P =$   
322 0.02) with parasitized nestlings having lower hemoglobin than non-parasitized nestlings (Table  
323 1). Food treatment had a marginally non-significant effect on hemoglobin levels ( $\chi^2 = 3.43$ ,  $df =$   
324 1,  $P = 0.06$ ) with unsupplemented nestlings having lower hemoglobin levels than supplemented  
325 nestlings (Table 1). These results were likely because hemoglobin levels were negatively related  
326 to parasite abundance across parasite treatments ( $\chi^2 = 18.60$ ,  $df = 1$ ,  $P < 0.0001$ ). The interaction  
327 between parasite and food treatment did not affect hemoglobin levels ( $\chi^2 = 1.29$ ,  $df = 1$ ,  $P =$   
328 0.26). Parasite treatment, food treatment, and the interaction between the two factors did not  
329 affect glucose levels (Tables 1 and S4) (parasite:  $\chi^2 = 0.41$ ,  $df = 1$ ,  $P = 0.52$ , food:  $\chi^2 = 0.83$ ,  $df =$   
330 1,  $P = 0.36$ , interaction:  $\chi^2 = 0.00$ ,  $df = 1$ ,  $P = 0.96$ ).

331

### 332 3.4 | Immune responses of parasitized nestlings

333 Food treatment affected nestling antibody levels (Table S5) (GLMM,  $\chi^2 = 5.96$ ,  $df =$   
334 1,  $P = 0.02$ ; supplemented,  $n = 9$ :  $0.53 \pm 0.15$ , unsupplemented,  $n = 11$ :  $0.24 \pm 0.07$ ) with  
335 supplemented nestlings having higher antibody levels than unsupplemented nestlings within the  
336 sham-fumigated treatment (Fig. 2A). Mean nestling antibody levels within a nest were negatively  
337 related to parasite abundance (Fig. 2B) (GLM,  $\chi^2 = 5.86$ ,  $df = 1$ ,  $P = 0.02$ ). Food treatment did  
338 not affect haptoglobin levels (Table S5) (GLM,  $\chi^2 = 0.20$ ,  $df = 1$ ,  $P = 0.65$ ; supplemented:  $0.36 \pm$



339 0.06, unsupplemented:  $0.32 \pm 0.04$ ;  $n = 5$  nestlings for both treatments). Haptoglobin levels were  
340 not significantly correlated with antibody levels (GLM,  $\chi^2 = 0.39$ ,  $df = 1$ ,  $P = 0.53$ ) or parasite  
341 abundance (GLM,  $\chi^2 = 0.08$ ,  $df = 1$ ,  $P = 0.78$ ).

342

### 343 3.5 | *Microbiota of parasitized nestlings*

344 Bacterial community structure and membership differed between the parasitized nestlings  
345 and mealworms, but did not differ between food treatments for the nestlings (Fig. 3A and B)  
346 (PERMANOVA, structure:  $F_{2,16} = 2.15$ ,  $P = 0.002$ , membership:  $F_{2,16} = 2.09$ ,  $P = 0.001$ ).  
347 Supplemented nestlings had higher bacterial diversity (sobs) compared to unsupplemented  
348 nestlings, but this difference was not significant for sobs (Fig. 4A) (Tables S5 and S6) (GLMM,  
349  $\chi^2 = 3.07$ ,  $df = 1$ ,  $P = 0.08$ ). Bacterial diversity (sobs) was not significantly related to antibody  
350 levels (Fig. 4B) (GLM,  $\chi^2 = 0.85$ ,  $df = 1$ ,  $P = 0.36$ ) but negatively related to parasite abundance  
351 (Fig. 4C) (GLMM,  $\chi^2 = 4.17$ ,  $df = 1$ ,  $P = 0.04$ ). Food treatment did not significantly affect the  
352 Shannon (GLMM,  $\chi^2 = 2.02$ ,  $df = 1$ ,  $P = 0.15$ ) and Simpson index (Tables S5 and S6) (GLMM,  
353  $\chi^2 = 1.41$ ,  $df = 1$ ,  $P = 0.24$ ). Neither indices were significantly correlated with parasite abundance  
354 (GLMM, Shannon:  $\chi^2 = 0.29$ ,  $df = 1$ ,  $P = 0.59$ , Simpson:  $\chi^2 = 0.13$ ,  $df = 1$ ,  $P = 0.71$ ) or antibody  
355 levels (GLM, Shannon:  $\chi^2 = 0.43$ ,  $df = 1$ ,  $P = 0.51$ , Simpson:  $\chi^2 = 0.30$ ,  $df = 1$ ,  $P = 0.59$ ).

356 The relative abundance of several bacterial phyla differed between the birds and  
357 mealworms. Birds in both treatments had higher relative abundances of phyla Planctomycetes  
358 (ANOVA,  $F = 8.61$ ,  $P = 0.04$ ) compared to the mealworms, but mealworms had higher relative  
359 abundances of phyla Cyanobacteria (ANOVA,  $F = 20.96$ ,  $P = 0.001$ ) and Tenericutes (ANOVA,  
360  $F = 7.65$ ,  $P = 0.04$ ) than the birds ( $P < 0.05$  for each pairwise test). Mealworms were dominated  
361 by phyla Firmicutes (36.03%), Proteobacteria (25.78%), Cyanobacteria (20.07%), Actinobacteria

362 (10.14%), Tenericutes (5.25%), and Bacteroidetes (2.44%). Nestling feces were dominated by  
363 phyla Proteobacteria (28.24%), Actinobacteria (28.05%), Firmicutes (21.91%), Bacteroidetes  
364 (8.07%), Cyanobacteria (6.14%), Planctomycetes (1.47%), and Saccharibacteria (1.04%).

365 Several bacterial genera differed between the nestlings and mealworms (Table S7).  
366 Genera with known pathogenic bacterial species were then compared specifically between  
367 supplemented and unsupplemented birds. *Campylobacter spp.*, *Listeria spp.*, *Mycobacteria spp.*,  
368 *Pasteurella spp.*, *Salmonella spp.*, and *Vibrios spp.* were not found in the feces of nestlings.  
369 Food treatment did not affect relative abundances of *Enterococcus spp.*, *Escherichia spp.*,  
370 *Lactobacillus spp.*, *Staphylococcus spp.*, and *Streptococcus spp.* Supplemented birds had higher  
371 relative abundances of genus *Clostridium* (Fig. 4D) (ANOVA,  $F = 7.92$ ,  $P = 0.02$ ) than  
372 unsupplemented birds. Relative abundance of *Clostridium spp.* correlated positively with  
373 antibody levels (Fig. 4E) (GLM,  $\chi^2 = 21.39$ ,  $df = 1$ ,  $P < 0.0001$ ) and negatively with parasite  
374 abundance (Fig. 4F) (GLM,  $\chi^2 = 3.59$ ,  $df = 1$ ,  $P = 0.058$ ), but did not correlate significantly with  
375 haptoglobin levels (GLM,  $\chi^2 = 0.11$ ,  $df = 1$ ,  $P = 0.74$ ).

376

#### 377 **4 | DISCUSSION**

378 The study showed that parasitism did not significantly affect growth or fledging success  
379 but negatively affected hemoglobin levels. Although nestlings maintained parasite tolerance  
380 across food treatments, food supplementation combatted the sublethal effects of parasitism by  
381 increasing nestling resistance to the parasites. However, food supplementation primarily  
382 benefited the birds (i.e. reduced parasite abundance) early in the breeding season. The extra food  
383 resources increased the nestling antibody response in parasitized nestlings, which decreased  
384 parasite abundance. Interestingly, haptoglobin levels did not relate to parasite abundance, nor

385 were they affected by food supplementation, suggesting that these acute phase proteins are not  
386 related to blowfly resistance. Supplementation also increased gut bacterial diversity in  
387 parasitized nestlings, which was negatively related to parasite abundance, but not the antibody  
388 response. However, specifically, supplementation increased the relative abundance of genus  
389 *Clostridium* spp., which was positively related to the antibody response and negatively related to  
390 parasite abundance. The mealworms had a distinct bacterial community from the birds, which  
391 suggests that the nutritional composition of the mealworms influenced the gut microbiota of the  
392 birds. Overall, these results suggest that food supplementation facilitates an increase in gut  
393 *Clostridium* spp., which potentially primes the non-specific antibody response in nestlings to  
394 resist parasitic nest flies.

395 Without the extra food, bluebird nestlings are tolerant to the parasitic nest flies, at least in  
396 relation to survival (Grab *et al.* 2019). Therefore, why does food supplementation increase  
397 resistance when the birds are already relatively well-defended against the parasite? Parasitism  
398 negatively affected hemoglobin levels, which could have had lasting effects after the young left  
399 the nest. For example, blowflies did not affect nestling mass or fledging success of ovenbirds  
400 (*Seiurus aurocapilla*), however, fledgling survival and minimum distance traveled the first day  
401 after fledging was significantly lower when the ovenbirds were parasitized (Streby, Peterson &  
402 Kapfer 2009). Thus, when extra food is available resource-dependent resistance is likely  
403 beneficial to ameliorate the long-term or subtle adverse effects of parasitism.

404 Traditionally, food supplementation is thought to have a direct effect on the antibody  
405 response produced by the host. Immune function can be condition-dependent because the  
406 immune response can be energetically costly to produce and therefore only hosts in good  
407 condition may be physiologically able to invest in these responses (reviewed by Sheldon and

408 Verhulst 1996; Lochmiller and Deerenberg 2000; Svensson *et al.* 1998). Other studies have  
409 found that supplemented nutrients can increase immunity (e.g. Ig antibodies) to parasites (Datta  
410 *et al.* 1998). For example, hosts fed a high-protein diet produced more IgG antibodies to  
411 parasitic worms compared to hosts fed a low-protein diet (Datta *et al.* 1998). Supplemented  
412 mealworms could provide the necessary additional protein to induce or increase the development  
413 of the IgY response in nestlings.

414 Food supplementation might have also or alternatively affected the nestling antibody  
415 response through changes in the gut microbiota. Host diet can affect the gut microbiota (David *et*  
416 *al.* 2014; Carmody *et al.* 2015; Knutie *et al.* 2017a). Specifically, my study found that food  
417 supplementation increased the relative abundance of *Clostridium* spp. and other studies have also  
418 found varying effects of host diet on *Clostridium* spp. abundance (e.g. in chickens) (Stutz &  
419 Lawton 1984; Mitsch *et al.* 2004; Jia *et al.* 2009). For example, Drew *et al.* (2004) found that  
420 protein supplementation increased *Clostridium perfringens* abundance. The high protein content  
421 of mealworms (46.44%) (Ravzanaadii *et al.* 2012) could be responsible for the increase  
422 *Clostridium* spp. abundance, but this idea requires further study.

423 A remaining question is whether the presence of *Clostridium* spp. in the gut is priming a  
424 non-specific antibody response to ectoparasitic nest flies. Pathogenic *Clostridium* spp. can  
425 activate the innate and adaptive immune system (including the IgY antibody response) in  
426 chickens (Kulkarni *et al.* 2007), which can be influenced by food supplementation (Yitbarek *et*  
427 *al.* 2012). Furthermore, priority effects, or the effect of one species on another species due to its  
428 earlier arrival, can influence the fitness of the multiple symbionts (Sousa 1992; de Roode *et al.*  
429 2005; Devevey *et al.* 2015). For example, initial infection by parasitic worms can negatively  
430 affect the establishment of subsequent infections by other parasitic species in the host

431 (Hoverman, Hoye & Johnson 2013; Wuerthner, Hua & Hoverman 2017), which could either be  
432 mediated by direct competition between the parasites or by the priming of the immune response  
433 of the host. Although gut bacteria and ectoparasites occupy different spaces on and in their host,  
434 the organisms are potentially exposed to the same circulating molecules related to the immune  
435 system (e.g. plasma IgY antibodies). However, future experimental studies are needed to  
436 determine whether increases in *Clostridium* spp. in hatchlings causally affects their IgY antibody  
437 response and resistance to *P. sialia*.

438         Between 1920-1970, bluebird populations declined throughout North America due, in  
439 part, to habitat destruction and the introduction of invasive species (Gowaty & Plissner 2015).  
440 However, in the 1980s, bluebird populations started to rebound because the public established  
441 nest boxes throughout the range of the bluebird. At study's field site, I established 70 nest boxes  
442 in 2014-15, which increased to 150 boxes by 2017. Consequently, the number of nesting  
443 bluebird pairs increased from six pairs in 2015 to 31 pairs in 2017, and this number continues to  
444 increase. Across the past several decades, the public also became concerned about nest parasites  
445 affecting the health of the birds and therefore, have implemented methods to eliminate or deter  
446 the parasites (Zeleny 1976). Methods to remove parasites include removing old nests from the  
447 box (Møller 1989) and placing deterrents in the box, such as vanilla extract and insecticides  
448 (S.A.K. pers. comm.). My study suggests that supplying mealworms to bluebirds not only  
449 increases the health of nestlings, but also reduces parasite loads in the nests. However, these  
450 effects are most pronounced during the early part of the breeding season, likely because natural  
451 insect (food) availability is lowest at this time (Bowlin & Winkler 2004).

452

453

454 **5 | CONCLUSION**

455           Determining the consequences of food supplementation is important because artificial  
456 bird feeding is a common activity for humans throughout the world (reviewed in Cox & Gaston  
457 2018). The results of this study show that increasing food availability for hosts can decrease  
458 parasite pressure, especially during formative life stages. However, studies have shown that  
459 having an epicenter of feeders where animals are directly or indirectly interacting can increase  
460 transmission of more directly transmitted parasites (Becker *et al.* 2015). Therefore, the effect of  
461 food supplementation on parasite resistance could vary when considering how feeders affect  
462 parasite exposure. In this study, only the focal bluebirds were visiting the feeders (S.A.K. pers.  
463 obs.), which reduced contact with other birds. Therefore, when feeding breeding birds, especially  
464 box-nesting birds, placing individual feeders in the birds' territory could increase host defenses  
465 without the risk of infection transmission.

466           Additionally, the results of the study might be particularly important for systems that are  
467 dealing with detrimental parasites, such as Darwin's finches of the Galapagos Islands or  
468 pardalotes of Australia and their parasitic nest flies (Fessl *et al.* 2010; Edworthy, Langmore &  
469 Heinsohn 2019). When managing the parasites is not immediately possible, providing additional  
470 food resources to the host could help increase their resistance (or even tolerance; (Knutie *et al.*  
471 2016; McNew *et al.* 2019)) to parasites. However, assessing the potential risks of providing  
472 additional resources to endangered or threatened species is required before attempting the  
473 method.

474

475

476

477 **ACKNOWLEDGEMENTS**

478 I thank Terry Whitworth for identifying *Protocalliphora sialia*, Steve Knutie and Doug  
479 Thompson for building nest boxes, and Itasca Biological Station (David Biesboer, Laura  
480 Domine, and Lesley Knoll) for logistical support. I also thank the following people for allowing  
481 us access to nest boxes on their property and their help in the field (in alphabetical order): Wade  
482 and Kelly Foy (Rock Creek General Store), Aaron Hebbeler, Jim Humeniuk, John and Dottie  
483 Hurlbert, Alvin and Dorothy Katzenmeyer, Lesley Knoll, Lake Itasca Pioneer Farmer's, Helen  
484 and Ken Perry, Natasha, Jay, Tatiana, and Jesse Smrekar, and Doug and Dawn Thompson. I  
485 thank Brian Hiller, McKenzie Ingram, Allie Parker, and Darya Pokutnaya for field assistance,  
486 Lauren Albert for lab assistance, Sabrina McNew, Samantha Rumschlag, and Michael Mahon for  
487 help with the statistical analyses, and Kendra Maas at the University of Connecticut Microbial  
488 Analysis, Resources, and Services for workshop training and advice on the Mothur  
489 bioinformatics. The work was funded by a Savaloja Research Grant from the Minnesota  
490 Ornithologists' Union, a Research Grant from the North American Bluebird Society, and start-up  
491 funds from the University of Connecticut. All applicable institutional guidelines for the care and  
492 use of animals were followed. The author declares no competing interests.

493

494 **DATA ACCESSIBILITY**

495 Sequences have been uploaded to GenBank (BioProject accession number: available upon  
496 acceptance) and data have been uploaded to FigShare (doi available upon acceptance).

497

498 **REFERENCES**

499 Altizer, S., Becker, D.J., Epstein, J.H., Forbes, K.M., Gillespie, T.R., Hall, R.J., Hawley, D.M.,

- 500 Hernandez, S.M., Martin, L.B., Plowright, R.K., Satterfield, D.A. & Streicker, D.G. (2018)  
501 Food for contagion: synthesis and future directions for studying host–parasite responses to  
502 resource shifts in anthropogenic environments. *Philosophical Transactions of the Royal*  
503 *Society B: Biological Sciences*, **373**, 20170102.
- 504 Becker, D.J., Hall, R.J., Forbes, K.M., Plowright, R.K. & Altizer, S. (2018) Anthropogenic  
505 resource subsidies and host–parasite dynamics in wildlife. *Philosophical Transactions of*  
506 *the Royal Society B: Biological Sciences*, **373**, 20180086.
- 507 Becker, D.J., Streicker, D.G. & Altizer, S. (2015) Linking anthropogenic resources to wildlife-  
508 pathogen dynamics: a review and meta-analysis. *Ecology Letters*, **18**, 483–495.
- 509 Benskin, C.M.H., Wilson, K., Jones, K. & Hartley, I.R. (2009) Bacterial pathogens in wild birds:  
510 a review of the frequency and effects of infection. *Biological Reviews*, **84**, 349–373.
- 511 Bosse, M., Spurgin, L.G., Laine, V.N., Cole, E.F., Firth, J.A., Gienapp, P., Gosler, A.G.,  
512 McMahon, K., Poissant, J., Verhagen, I., Groenen, M.A.M., Van Oers, K., Sheldon, B.C.,  
513 Visser, M.E. & Slate, J. (2017) Recent natural selection causes adaptive evolution of an  
514 avian polygenic trait. *Science*, **6361**, 365–368.
- 515 Bowlin, M.S. & Winkler, D.W. (2004) Natural variation in flight performance Is related to  
516 timing of breeding in tree swallows (*Tachycineta bicolor*) in New York. *The Auk*, **121**, 345–  
517 353.
- 518 Carmody, R.N., Gerber, G.K., Luevano, J.M., Gatti, D.M., Somes, L., Svenson, K.L. &  
519 Turnbaugh, P.J. (2015) Diet dominates host genotype in shaping the murine gut microbiota.  
520 *Cell Host and Microbe*, **17**, 72–84.
- 521 Christe, P., Richner, H. & Oppliger, A. (1996) Begging, food provisioning, and nestling  
522 competition in great tit broods infested with ectoparasites. *Behavioral Ecology*, **7**, 127–131.



- 523 Coop, R.L. & Kyriazakis, I. (2001) Influence of host nutrition on the development and  
524 consequences of nematode parasitism in ruminants. *Trends in Parasitology*, **17**, 325–330.
- 525 Cornet, S., Bichet, C., Larcombe, S., Faivre, B. & Sorci, G. (2014) Impact of host nutritional  
526 status on infection dynamics and parasite virulence in a bird-malaria system. *The Journal of*  
527 *Animal Ecology*, **83**, 256–265.
- 528 Cotter, S.C., Simpson, S.J., Raubenheimer, D. & Wilson, K. (2011) Macronutrient balance  
529 mediates trade-offs between immune function and life history traits. *Functional Ecology*,  
530 **25**, 186–198.
- 531 Cox, D.T.C. & Gaston, K.J. (2016) Urban bird feeding: connecting people with nature. *PLoS*  
532 *ONE*, **11**, e0158717.
- 533 Cox, D.T.C. & Gaston, K.J. (2018) Human–nature interactions and the consequences and drivers  
534 of provisioning wildlife. *Philosophical Transactions of the Royal Society B: Biological*  
535 *Sciences*, **373**, 20170092.
- 536 Cox, D.T.C., Inger, R., Hancock, S., Anderson, K. & Gaston, K.J. (2016) Movement of feeder-  
537 using songbirds: the influence of urban features. *Scientific Reports*, **6**, 37669.
- 538 Datta, F.U., Nolan, J. V., Rowe, J.B. & Gray, G.D. (1998) Protein supplementation improves the  
539 performance of parasitised sheep fed a straw-based diet. *International Journal for*  
540 *Parasitology*, **28**, 1269–1278.
- 541 David, L.A., Maurice, C.F., Carmody, R.N., Gootenberg, D.B., Button, J.E., Wolfe, B.E., Ling,  
542 A. V, Devlin, A.S., Varma, Y., Fischbach, M.A., Biddinger, S.B., Dutton, R.J. &  
543 Turnbaugh, P.J. (2014) Diet rapidly and reproducibly alters the human gut microbiome.  
544 *Nature*, **505**, 559–563.
- 545 Demas, G.E. (2004) The energetics of immunity: a neuroendocrine link between energy balance

- 546 and immune function. *Hormones and Behavior*, **45**, 173–180.
- 547 DeSimone, J.G., Clotfelter, E.D., Black, E.C. & Knutie, S.A. (2018) Avoidance, tolerance, and  
548 resistance to ectoparasites in nestling and adult tree swallows. *Journal of Avian Biology*, **49**,  
549 jav-01641.
- 550 Devevey, G., Dang, T., Graves, C.J., Murray, S. & Brisson, D. (2015) First arrived takes all:  
551 inhibitory priority effects dominate competition between co-infecting *Borrelia burgdorferi*  
552 strains. *BMC Microbiology*, **15**, 61.
- 553 Drew, M.D., Syed, N.A., Goldade, B.G., Laarveld, B. & Van Kessel, A.G. (2004) Effects of  
554 dietary protein source and level on intestinal populations of *Clostridium perfringens* in  
555 broiler chickens. *Poultry Science*, **83**, 414–420.
- 556 Edgar, R.C., Haas, B.J., Clemente, J.C., Quince, C. & Knight, R. (2011) UCHIME improves  
557 sensitivity and speed of chimera detection. *Bioinformatics*, **27**, 2194–2200.
- 558 Edworthy, A.B., Langmore, N.E. & Heinsohn, R. (2019) Native fly parasites are the principal  
559 cause of nestling mortality in endangered Tasmanian pardalotes. *Animal Conservation*, **22**,  
560 96–103.
- 561 Fessl, B., Young, G.H., Young, R.P., Rodríguez-Matamoros, J., Dvorak, M., Tebbich, S. & Fa,  
562 J.E. (2010) How to save the rarest Darwin’s finch from extinction: the mangrove finch on  
563 Isabela Island. *Philosophical Transactions of the Royal Society of London B*, **365**, 1019–  
564 1030.
- 565 Fox, J. & Weisberg, S. (2002) An {R} Companion to Applied Regression. *Sage Publications*, 2–  
566 3.
- 567 Fuller, R.A., Warren, P.H., Armsworth, P.R., Barbosa, O. & Gaston, K.J. (2008) Garden bird  
568 feeding predicts the structure of urban avian assemblages. *Diversity and Distributions*, **14**,

- 569 131–137.
- 570 Gowaty, P.A. & Plissner, J.H. (2015) Eastern bluebird (*Sialia sialis*). *The Birds of North*  
571 *America Online*, 2nd ed (ed A. Poole), Cornell Lab of Ornithology, Ithaca, NY, USA.
- 572 Grab, K.M., Hiller, B.J., Hurlbert, J.H., Ingram, M.E., Parker, A.B., Pokutnaya, D.Y. & Knutie,  
573 S.A. (2019) Host tolerance and resistance to parasitic nest flies differs between two wild  
574 bird species. *Ecology and Evolution*, 12144–12155.
- 575 Hannam, K. (2006) Ectoparasitic blow flies (*Protocalliphora* sp.) and nestling Eastern Bluebirds  
576 (*Sialia sialis*): direct effects and compensatory strategies. *Canadian Journal of Zoology*, **84**,  
577 921–930.
- 578 Hooper, L. V., Littman, D.R. & Macpherson, A.J. (2012) Interactions between the microbiota  
579 and the immune system. *Science*, **336**, 1268–1273.
- 580 Hoverman, J.T., Hoyer, B.J. & Johnson, P.T.J. (2013) Does timing matter? How priority effects  
581 influence the outcome of parasite interactions within hosts. *Oecologia*, **173**, 1471–1480.
- 582 Howick, V.M. & Lazzaro, B.P. (2014) Genotype and diet shape resistance and tolerance across  
583 distinct phases of bacterial infection. *BMC Evolutionary Biology*, **14**, 56.
- 584 Jia, W., Slominski, B.A., Bruce, H.L., Blank, G., Crow, G. & Jones, O. (2009) Effects of diet  
585 type and enzyme addition on growth performance and gut health of broiler chickens during  
586 subclinical *Clostridium perfringens* challenge. *Poultry Science*, **88**, 132–140.
- 587 Johnson, C.W. (1929) The injury to nestling birds by the larvae of *Protocalliphora*. *Annals of the*  
588 *Entomological Society of America*, **22**, 131–135.
- 589 Jones, D. (2011) An appetite for connection: why we need to understand the effect and value of  
590 feeding wild birds. *Emu*, **111**, i–vii.
- 591 Jones, D.N. & James Reynolds, S. (2008) Feeding birds in our towns and cities: a global research

- 592 opportunity. *Journal of Avian Biology*, **39**, 265–271.
- 593 Knutie, S.A., Owen, J.P., McNew, S.M., Bartlow, A.W., Arriero, E., Herman, J.M., DiBlasi, E.,  
594 Thompson, M., Koop, J.A.H. & Clayton, D.H. (2016) Galápagos mockingbirds tolerate  
595 introduced parasites that affect Darwin’s finches. *Ecology*, **97**, 940–950.
- 596 Knutie, S.A., Shea, L.A., Kupselaitis, M., Wilkinson, C.L., Kohl, K.D. & Rohr, J.R. (2017a)  
597 Early-life diet affects host microbiota and later-life defenses against parasites in frogs.  
598 *Integrative and Comparative Biology*, **57**, 732–742.
- 599 Knutie, S.A., Wilkinson, C.L., Kohl, K.D. & Rohr, J.R. (2017b) Early-life disruption of  
600 amphibian microbiota decreases later-life resistance to parasites. *Nature Communications*,  
601 **8**, 86.
- 602 Knutie, S.A., Wilkinson, C.L., Wu, Q.C., Ortega, C.N. & Rohr, J.R. (2017c) Host resistance and  
603 tolerance of parasitic gut worms depend on resource availability. *Oecologia*, **183**, 1031–  
604 1040.
- 605 Kozich, J.J., Westcott, S.L., Baxter, N.T., Highlander, S.K. & Schloss, P.D. (2013) Development  
606 of a dual-index sequencing strategy and curation pipeline for analyzing amplicon sequence  
607 data on the miseq illumina sequencing platform. *Applied and Environmental Microbiology*,  
608 **79**, 5112–5120.
- 609 Kulkarni, R.R., Parreira, V.R., Sharif, S. & Prescott, J.F. (2007) Immunization of broiler  
610 chickens against *Clostridium perfringens*-induced necrotic enteritis. *Clinical and Vaccine*  
611 *Immunology*, **14**, 1070–1077.
- 612 Kumar, P.S., Mason, M.R., Brooker, M.R. & O’Brien, K. (2012) Pyrosequencing reveals unique  
613 microbial signatures associated with healthy and failing dental implants. *Journal of Clinical*  
614 *Periodontology*, **39**, 425–433.

- 615 Lee, K.P., Cory, J.S., Wilson, K., Raubenheimer, D. & Simpson, S.J. (2006) Flexible diet choice  
616 offsets protein costs of pathogen resistance in a caterpillar. *Proceedings of the Royal Society*  
617 *B: Biological Sciences*, **273**, 823–829.
- 618 Lochmiller, R.L. & Deerenberg, C. (2000) Trade-offs in evolutionary immunology: just what is  
619 the cost of immunity? *Oikos*, **88**, 87–98.
- 620 Lochmiller, R.L., Vestey, M.R. & Boren, J.C. (1993) Relationship between protein nutritional  
621 status and immunocompetence in northern bobwhite chicks. *The Auk*, **110**, 503–510.
- 622 McNew, S.M., Knutie, S.A., Goodman, G.B., Theodosopoulos, A., Saulsberry, A., Yépez R., J.,  
623 Bush, S.E. & Clayton, D.H. (2019) Annual environmental variation influences host  
624 tolerance to parasites. *Proceedings of the Royal Society B: Biological Sciences*, **286**,  
625 20190049.
- 626 Medzhitov, R., Schneider, D. & Soares, M. (2012) Disease tolerance as a defense strategy.  
627 *Science*, **335**, 936–941.
- 628 Miller, M.R., White, A. & Boots, M. (2006) The evolution of parasites in response to tolerance  
629 in their hosts: the good, the bad, and apparent commensalism. *Evolution*, **60**, 945–956.
- 630 Mitsch, P., Zitterl-Eglseer, K., Kohler, B., Gabler, C., Losa, R. & Zimpernik, I. (2004) The effect  
631 of two different blends of essential oil components on the proliferation of *Clostridium*  
632 *perfringens* in the intestines of broiler chickens. *Poultry Science*, **83**, 669–675.
- 633 Møller, A.P. (1989) Parasites, predators and nest boxes: facts and artefacts in nest box studies of  
634 birds? *Oikos*, **56**, 421–423.
- 635 Murray, M.H., Becker, D.J., Hall, R.J. & Hernandez, S.M. (2016) Wildlife health and  
636 supplemental feeding: A review and management recommendations. *Biological*  
637 *Conservation*, **204**, 163–174.

- 638 Owen, J.P., Delany, M.E., Cardona, C.J., Bickford, A.A. & Mullens, B.A. (2009) Host  
639 inflammatory response governs fitness in an avian ectoparasite, the northern fowl mite  
640 (*Ornithonyssus sylviarum*). *International Journal for Parasitology*, **39**, 789–799.
- 641 Owen, J.P., Nelson, A.C. & Clayton, D.H. (2010) Ecological immunology of bird-ectoparasite  
642 systems. *Trends in Parasitology*, **26**, 530–9.
- 643 Pinkowski, B.C. (1977a) Foraging behavior of the eastern bluebird. *The Wilson Bulletin*, **89**,  
644 404–414.
- 645 Pinkowski, B.C. (1977b) Blowfly parasitism of eastern bluebirds in natural and artificial nest  
646 sites. *Journal of Wildlife Management*, **41**, 272–276.
- 647 Quast, C., Pruesse, E., Yilmaz, P., Gerken, J., Schweer, T., Yarza, P., Peplies, J. & Glöckner,  
648 F.O. (2013) The SILVA ribosomal RNA gene database project: improved data processing  
649 and web-based tools. *Nucleic Acids Research*, **41**, D590–D596.
- 650 Råberg, L., Sim, D. & Read, A.F. (2007) Disentangling genetic variation for resistance and  
651 tolerance to infectious diseases in animals. *Science*, **318**, 812–814.
- 652 Ravzanaadii, N., Kim, S.-H., Choi, W.-H., Hong, S.-J. & Kim, N.-J. (2012) Nutritional value of  
653 mealworm, *Tenebrio molitor*, as food source. *International Journal of Industrial*  
654 *Entomology*, **25**, 93–98.
- 655 Read, A.F., Graham, A.L. & Råberg, L. (2008) Animal defenses against infectious agents: is  
656 damage control more important than pathogen control. *PLoS Biology*, **6**, 2638–2641.
- 657 Robb, G.N., McDonald, R.A., Chamberlain, D.E. & Bearhop, S. (2008) Food for thought:  
658 supplementary feeding as a driver of ecological change in avian populations. *Frontiers in*  
659 *Ecology and the Environment*, **6**, 476–484.
- 660 Roby, D.D., Brink, K.L. & Whitmann, K. (1992) Effects of bird blowfly parasitism on eastern

- 661 bluebird and tree swallow nestlings. *Wilson Bulletin*, **104**, 630–643.
- 662 de Roode, Michelle E. H. Helinski, Anwar & Read. (2005) Dynamics of multiple infection and  
663 within-host competition in genetically diverse malaria infections. *The American Naturalist*,  
664 **166**, 531.
- 665 Round, J.L. & Mazmanian, S.K. (2009) The gut microbiota shapes intestinal immune responses  
666 during health and disease. *Nature Reviews Immunology*, **9**, 313–323.
- 667 Ruhs, E.C., Vézina, F. & Karasov, W. (2018) Physiological and immune responses of free-  
668 living, temperate birds provided a gradient of food supplementation. *Physiological and*  
669 *Biochemical Zoology*, **92**, 701389.
- 670 Sánchez, C.A., Becker, D.J., Teitelbaum, C.S., Barriga, P., Brown, L.M., Majewska, A.A., Hall,  
671 R.J. & Altizer, S. (2018) On the relationship between body condition and parasite infection  
672 in wildlife: a review and meta-analysis. *Ecology Letters*, **21**, 1869–1884.
- 673 Sauer, J.R. & Droege, S. (1990) Recent population trends of the eastern bluebird. *The Wilson*  
674 *Bulletin*, **102**, 239–252.
- 675 Schloss, P.D., Westcott, S.L., Ryabin, T., Hall, J.R., Hartmann, M., Hollister, E.B., Lesniewski,  
676 R.A., Oakley, B.B., Parks, D.H., Robinson, C.J., Sahl, J.W., Stres, B., Thallinger, G.G., Van  
677 Horn, D.J. & Weber, C.F. (2009) Introducing mothur: Open-source, platform-independent,  
678 community-supported software for describing and comparing microbial communities.  
679 *Applied and Environmental Microbiology*, **75**, 7537–7541.
- 680 Shaw, A., Miller, K. & Wescott, G. (2017) Australian native gardens: Is there scope for a  
681 community shift? *Landscape and Urban Planning*, **157**, 322–330.
- 682 Shchipkova, A.Y., Nagaraja, H.N. & Kumar, P.S. (2010) Subgingival microbial profiles of  
683 smokers with periodontitis. *Journal of Dental Research*, **89**, 1247–1253.

- 684 Sheldon, B.C. & Verhulst, S. (1996) Ecological immunology: costly parasite defences and trade-  
685 offs in evolutionary ecology. *Trends in Ecology & Evolution*, **11**, 317–321.
- 686 Simms, E.L. (2000) Defining tolerance as a norm of reaction. *Evolutionary Ecology*, **14**, 563–  
687 570.
- 688 Smar, M. (1996) The Ecology of Protocalliphora (Diptera: Calliphoridae) Parasitism of Two  
689 Cavity Nesting Passerine Birds in Southwestern Quebec. Master's Thesis, McGill  
690 University.
- 691 Sousa, W.P. (1992) Interspecific interactions among larval trematode parasites of freshwater and  
692 marine snails. *American Zoologist*, **32**, 583–592.
- 693 Start, D., Bonner, C., Weis, A.E. & Gilbert, B. (2018) Consumer-resource interactions along  
694 urbanization gradients drive natural selection. *Evolution*, **9**, 1863–1873.
- 695 Sternberg, E.D., Lefèvre, T., Li, J., de Castillejo, C.L.F., Li, H., Hunter, M.D. & de Roode, J.C.  
696 (2012) Food plant derived disease tolerance and resistance in a natural butterfly-plant-  
697 parasite interactions. *Evolution*, **66**, 3367–3376.
- 698 Strandin, T., Babayan, S.A. & Forbes, K.M. (2018) Reviewing the effects of food provisioning  
699 on wildlife immunity. *Philosophical Transactions of the Royal Society B: Biological  
700 Sciences*, **373**, 20170088.
- 701 Streby, H.M., Peterson, S.M. & Kapfer, P.M. (2009) Fledging success is a poor indicator of the  
702 effects of bird blow flies on ovenbird survival. *The Condor*, **111**, 193–197.
- 703 Stutz, M.W. & Lawton, G.C. (1984) Effects of diet and antimicrobials on growth, feed  
704 efficiency, intestinal *Clostridium perfringens*, and ileal weight of broiler chicks. *Poultry  
705 Science*, **63**, 2036–2042.
- 706 Svensson, E., Råberg, L., Koch, C. & Hasselquist, D. (1998) Energetic stress,



- 707 immunosuppression and the costs of an antibody response. *Functional Ecology*, **12**, 912–  
708 919.
- 709 Tollington, S., Ewen, J.G., Newton, J., McGill, R.A.R., Smith, D., Henshaw, A., Fogell, D.J.,  
710 Tatayah, V., Greenwood, A., Jones, C.G. & Groombridge, J.J. (2019) Individual  
711 consumption of supplemental food as a predictor of reproductive performance and viral  
712 infection intensity. *Journal of Applied Ecology*, **56**, 594–603.
- 713 Tripet, F. & Richner, H. (1997) Host responses to ectoparasites: food compensation by parent  
714 blue tits. *Oikos*, **78**, 557–561.
- 715 Wang, Q., Garrity, G.M., Tiedje, J.M. & Cole, J.R. (2007) Naïve Bayesian classifier for rapid  
716 assignment of rRNA sequences into the new bacterial taxonomy. *Applied and*  
717 *Environmental Microbiology*, **73**, 5261–5267.
- 718 Wilcoxon, T.E., Horn, D., Hogan, B.M., Hubble, C.N., Huber, S.J., Flamm, J., Knott, M.,  
719 Lundstrom, L., Salik, F., Wassenhove, S.J. & Wrobel, E.R. (2015) Effects of bird-feeding  
720 activities on the health of wild birds. *Conservation Physiology*, **3**, cov058.
- 721 Wittmann, K. & Beason, R.C. (1992) The effect of blowfly parasitism on nestling eastern  
722 bluebird development. *Journal of Field Ornithology*, **63**, 286–293.
- 723 Wuerthner, V.P., Hua, J. & Hoverman, J.T. (2017) The benefits of coinfection: trematodes alter  
724 disease outcomes associated with virus infection. *Journal of Animal Ecology*, **86**, 921–931.
- 725 Yitbarek, A., Echeverry, H., Brady, J., Hernandez-Doria, J., Camelo-Jaimes, G., Sharif, S.,  
726 Guenter, W., House, J.D. & Rodriguez-Lecompte, J.C. (2012) Innate immune response to  
727 yeast-derived carbohydrates in broiler chickens fed organic diets and challenged with  
728 *Clostridium perfringens*. *Poultry Science*, **91**, 1105–1112.
- 729 Zeleny, L. 1976. *The Bluebird: How You Can Help Its Fight For Survival*. Indiana University

730 Press, Bloomington, IN, USA. 170pp.

731

732 **Figure Legend**

733 Fig. 1. Effect of food and parasite treatment on parasite load and fledging success of bluebirds.

734 Birds that were supplemented with food were more resistant to parasites than birds that were not

735 supplemented (A). Parasite abundance decreased throughout the breeding season in the

736 unsupplemented treatment but not the supplemented treatment (B). Parasitism did not affect

737 fledging success, but supplemented birds had marginally higher fledging success than

738 unsupplemented bird (C). Within the parasitized treatment, birds from each treatment were

739 tolerant to their respective parasite abundances (D).

740

741 Fig. 2. Within the parasitized treatment, supplemented birds had higher antibody levels than

742 unsupplemented birds (A). Antibody levels were negatively related to parasite abundance (B).

743

744 Fig. 3. Within the parasitized treatment, bacterial community structure (A) and membership (B)

745 of nestlings did not differ between food treatments. The bacterial community of mealworms was

746 distinct from the bacterial community of the nestlings.

747

748 Fig. 4. Effect of food treatment on microbiota of nestlings and the relationships among

749 microbiota, immune response, and parasite abundance within the parasitized treatment.

750 Supplemented nestlings had marginally higher bacterial diversity than unsupplemented nestlings

751 (A). Bacterial diversity was not significantly related to antibody levels (B) but negatively related

752 to parasite abundance (C). Relative abundance of *Clostridium* spp. was higher in supplemented

753 nestlings than unsupplemented nestlings (D). *Clostridium* spp. abundance was positively related

754 to antibody levels (E) and negatively related to parasite abundance (F).

755 Table 1. Effect of parasite and food treatment on nestling growth, physiology, and fledging  
 756 success. Numbers are mean  $\pm$  SE and numbers in parentheses are the number of nests.

| Measurement                            | Non-supplemented          |                            | Supplemented              |                           |
|----------------------------------------|---------------------------|----------------------------|---------------------------|---------------------------|
|                                        | Non-<br>parasitized       | Parasitized                | Non-<br>parasitized       | Parasitized               |
| Parasite<br>abundance                  | 0.00 $\pm$ 0.00<br>(9)    | 55.55 $\pm$ 10.60<br>(11)  | 0.00 $\pm$ 0.00<br>(6)    | 12.89 $\pm$ 5.00<br>(9)   |
| Bill length (mm)                       | 5.00 $\pm$ 0.12<br>(6)    | 5.19 $\pm$ 0.14<br>(11)    | 5.26 $\pm$ 0.22<br>(6)    | 5.27 $\pm$ 0.10<br>(9)    |
| Tarsus length<br>(mm)                  | 18.35 $\pm$ 0.19<br>(6)   | 18.60 $\pm$ 0.23<br>(11)   | 18.32 $\pm$ 0.25<br>(6)   | 18.93 $\pm$ 0.13<br>(9)   |
| 1 <sup>st</sup> primary length<br>(mm) | 13.64 $\pm$ 1.06<br>(6)   | 16.41 $\pm$ 1.51<br>(11)   | 17.26 $\pm$ 1.43<br>(6)   | 17.81 $\pm$ 0.81<br>(9)   |
| Mass (g)                               | 25.71 $\pm$ 0.77<br>(6)   | 25.50 $\pm$ 0.77<br>(11)   | 27.21 $\pm$ 0.52<br>(6)   | 27.11 $\pm$ 0.56<br>(9)   |
| Hemoglobin<br>levels (g/dL)            | 11.21 $\pm$ 0.47<br>(5)   | 8.29 $\pm$ 0.83<br>(11)    | 11.55 $\pm$ 0.30<br>(6)   | 10.54 $\pm$ 0.88<br>(9)   |
| Glucose levels<br>(mg/dL)              | 282.50 $\pm$ 17.53<br>(5) | 287.30 $\pm$ 32.50<br>(11) | 321.30 $\pm$ 25.09<br>(6) | 293.40 $\pm$ 18.80<br>(9) |
| Nestlings fledged                      | 26/34 (77%)               | 48/51 (94%)                | 21/21 (100%)              | 38/39 (97%)               |

757

758 Fig. 1.

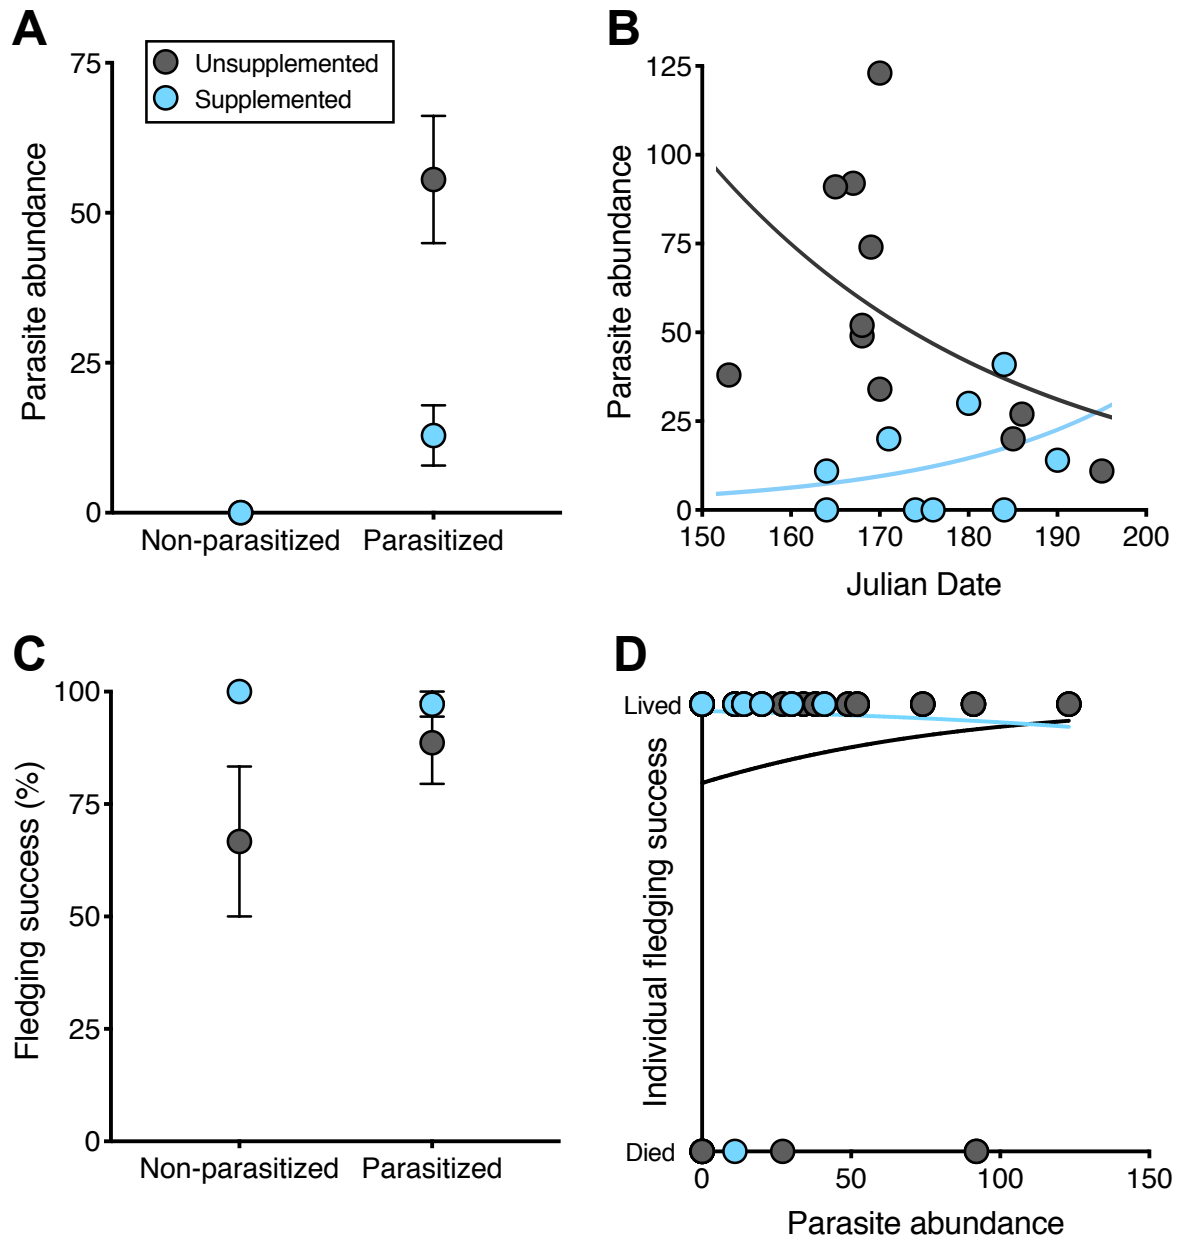

759

760

761 Fig. 2.

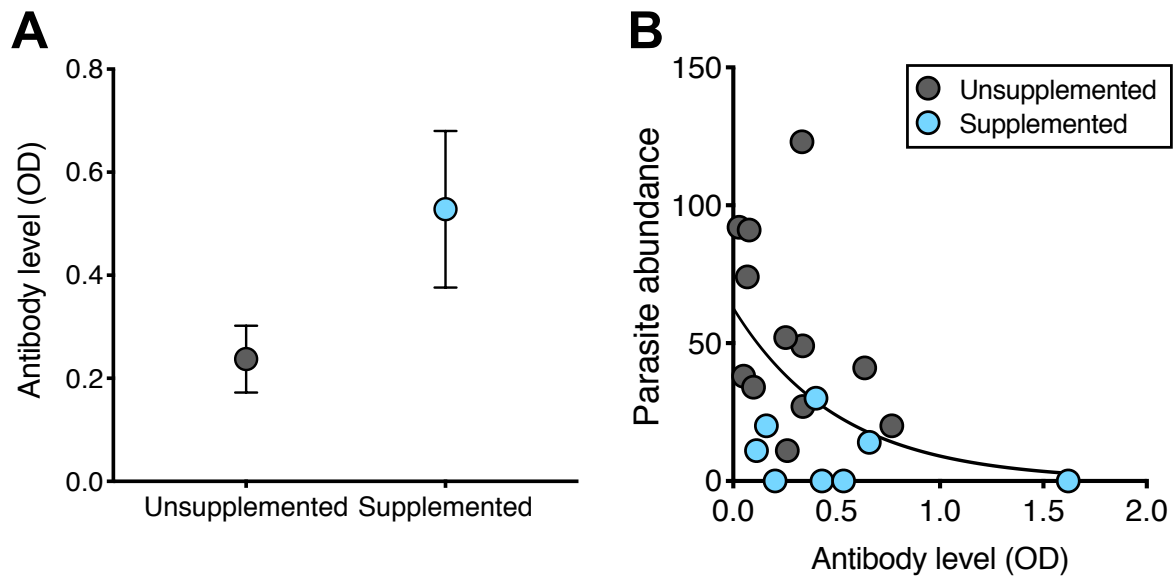

762

763

764 Fig. 3.

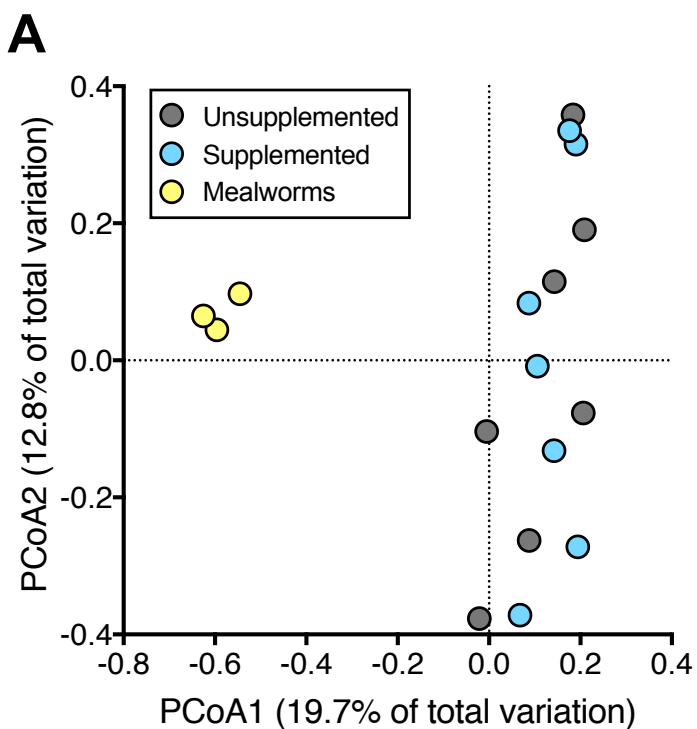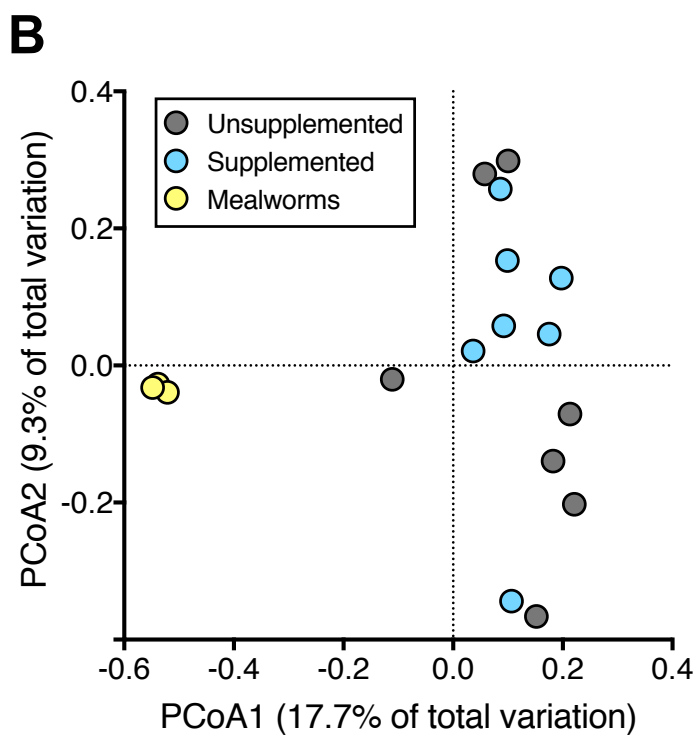

766 Fig. 4.

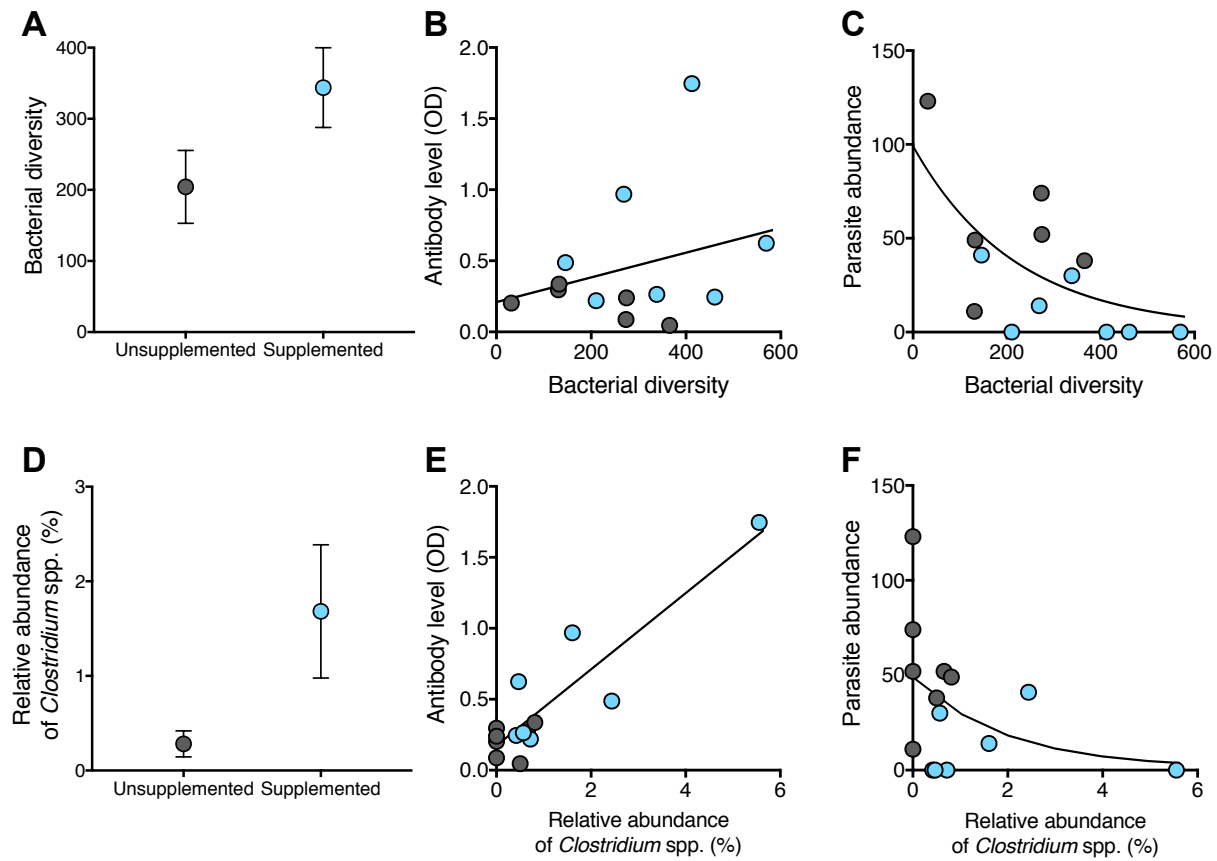

767
