# Supplementary material for: Food supplementation affects gut microbiota and immunological resistance to parasites in a wild bird species
Source: bioRxiv or medRxiv preprint supplement (doi:10.1101/770644), 2019-12-01
Supplement: Supplementary file [file media-1.pdf]

## Food supplementation affects gut microbiota and immunological resistance to parasites in a wild bird species

S.A. Knutie

Table S1. Pairwise correlation coefficients between growth metrics (bill length, tarsus length, first primary feather length, and body mass).

|                | Bill length | Tarsus length | Feather length | Body mass |
|----------------|-------------|---------------|----------------|-----------|
| Bill length    | 1.00        |               |                |           |
| Tarsus length  | 0.37        | 1.00          |                |           |
| Feather length | 0.65        | 0.47          | 1.00           |           |
| Body mass      | 0.48        | 0.38          | 0.66           | 1.00      |

Table S2. The effect of parasite treatment, food treatment, and their interaction on parasite abundance.

| <b>Variables</b>          | <b>Coefficients <math>\pm</math> SE</b> |
|---------------------------|-----------------------------------------|
| Parasite treatment        | 12.89 $\pm$ 10.60                       |
| Food treatment            | 0.00 $\pm$ 10.60                        |
| Parasite x food treatment | 42.66 $\pm$ 13.94                       |

Table S3. The effect of food treatment, Julian date, and their interaction on parasite abundance within the sham-fumigated treatment.

| <b>Variables</b>             | <b>Coefficients <math>\pm</math> SE</b> |
|------------------------------|-----------------------------------------|
| Food treatment               | 21.24 $\pm$ 8.88                        |
| Julian date                  | 0.05 $\pm$ 0.04                         |
| Food treatment x Julian date | -0.11 $\pm$ 0.05                        |

Table S4. The effect of parasite treatment, food treatment, and their interaction on growth, hemoglobin levels, and glucose levels.

| <b>Variables</b>          | <b>Coefficients <math>\pm</math> SE</b> |
|---------------------------|-----------------------------------------|
| Bill length               |                                         |
| Parasite treatment        | 0.00 $\pm$ 0.02                         |
| Food treatment            | -0.02 $\pm$ 0.02                        |
| Parasite x food treatment | 0.01 $\pm$ 0.02                         |
| Tarsus                    |                                         |
| Parasite treatment        | 0.02 $\pm$ 0.01                         |
| Food treatment            | 0.00 $\pm$ 0.01                         |
| Parasite x food treatment | -0.01 $\pm$ 0.01                        |
| First primary length      |                                         |
| Parasite treatment        | 0.02 $\pm$ 0.06                         |
| Food treatment            | -0.10 $\pm$ 0.07                        |
| Parasite x food treatment | 0.05 $\pm$ 0.08                         |
| Body mass                 |                                         |
| Parasite treatment        | -0.00 $\pm$ 0.02                        |
| Food treatment            | -0.03 $\pm$ 0.02                        |
| Parasite x food treatment | -0.00 $\pm$ 0.02                        |
| Hemoglobin                |                                         |
| Parasite treatment        | -0.05 $\pm$ 0.06                        |
| Food treatment            | -0.01 $\pm$ 0.07                        |
| Parasite x food treatment | -0.10 $\pm$ 0.09                        |
| Glucose                   |                                         |
| Parasite treatment        | -0.04 $\pm$ 0.08                        |
| Food treatment            | -0.05 $\pm$ 0.09                        |
| Parasite x food treatment | 0.01 $\pm$ 0.12                         |

Table S5. The effect of food treatment on immune responses and bacterial diversity metrics.

| <b>Variables</b>    | <b>Coefficients <math>\pm</math> SE</b> |
|---------------------|-----------------------------------------|
| IgY antibody levels | -0.28 $\pm$ 0.11                        |
| Haptoglobin levels  | -0.03 $\pm$ 0.07                        |
| Bacterial diversity |                                         |
| sobs                | -0.30 $\pm$ 0.17                        |
| Shannon index       | -1.06 $\pm$ 0.74                        |
| Simpson Index       | -0.32 $\pm$ 0.27                        |

Table S6. The effect of food treatment on mean  $\pm$  SE bacterial diversity metrics. Numbers in the parentheses are the sample sizes of nests.

| <b>Variables</b> | <b>Supplemented</b>    | <b>Unsupplemented</b>  |
|------------------|------------------------|------------------------|
| sobs             | 343.80 $\pm$ 56.04 (7) | 204.25 $\pm$ 51.28 (6) |
| Shannon index    | 3.14 $\pm$ 0.41 (7)    | 2.06 $\pm$ 0.64 (6)    |
| Simpson index    | 12.85 $\pm$ 3.38 (7)   | 9.60 $\pm$ 5.00 (6)    |

Table S7. Relative abundances (%) of bacterial genera that differ between the birds (supplemented: S, unsupplemented: US) and mealworms (MW). Numbers (%) in bold indicate which treatment of birds are statistically different from the mealworms (Tukey:  $P < 0.05$ ).

| Genus                         | MW    | S           | US          | Statistics                 |
|-------------------------------|-------|-------------|-------------|----------------------------|
| <i>Brachybacterium</i>        | 1.90  | <b>0.08</b> | <b>0.00</b> | $F = 67.12, P < 0.0001$    |
| <i>Brevibacterium</i>         | 5.08  | <b>0.13</b> | <b>0.00</b> | $F = 103.35, P < 0.0001$   |
| <i>Candidatus</i>             | 0.00  | <b>2.68</b> | <b>2.41</b> | $F = 18.38, P = 0.002$     |
| <i>Dietzia</i>                | 1.25  | <b>0.00</b> | <b>0.00</b> | $F = 11.53, P = 0.01$      |
| <i>Erysipelatoclostridium</i> | 0.00  | <b>2.46</b> | <b>3.89</b> | $F = 9.17, P = 0.03$       |
| <i>Hyphomicrobium</i>         | 0.00  | <b>1.43</b> | <b>0.97</b> | $F = 8.14, P = 0.04$       |
| <i>Kocuria</i>                | 1.90  | <b>0.20</b> | <b>0.00</b> | $F = 34.96, P = 0.0001$    |
| <i>Lactobacillus</i>          | 8.96  | <b>0.45</b> | <b>0.00</b> | $F = 31.82, P = 0.0001$    |
| <i>Lactococcus</i>            | 15.88 | <b>0.72</b> | <b>0.67</b> | $F = 31.91, P = 0.0001$    |
| <i>Methylobacterium</i>       | 0.62  | <b>3.83</b> | <b>3.94</b> | $F = 9.27, P = 0.03$       |
| <i>Mycobacterium</i>          | 0.00  | <b>2.53</b> | <b>2.50</b> | $F = 11.55, P = 0.01$      |
| <i>Nocardioides</i>           | 0.00  | <b>6.01</b> | <b>5.93</b> | $F = 24.47, P < 0.001$     |
| <i>Pantoea</i>                | 1.90  | <b>0.66</b> | <b>0.66</b> | $F = 7.57, P = 0.04$       |
| <i>Parabacteroides</i>        | 1.27  | <b>0.08</b> | <b>0.00</b> | $F = 7.56, P = 0.04$       |
| <i>Parasutterella</i>         | 1.90  | <b>0.00</b> | <b>0.00</b> | $F = 40015.68, P < 0.0001$ |
| <i>Rhizobium</i>              | 0.00  | <b>1.40</b> | <b>1.67</b> | $F = 9.85, P = 0.02$       |
| <i>Rhodococcus</i>            | 0.00  | <b>2.32</b> | <b>2.13</b> | $F = 9.77, P = 0.02$       |
| <i>Spiroplasma</i>            | 10.78 | <b>0.33</b> | <b>0.20</b> | $F = 64.65, P < 0.0001$    |
| <i>Staphylococcus</i>         | 5.07  | <b>0.52</b> | <b>0.35</b> | $F = 11.96, P = 0.01$      |
| <i>Variibacter</i>            | 0.00  | <b>0.97</b> | 0.56        | $F = 7.75, P = 0.04$       |
| <i>Weissella</i>              | 9.41  | <b>0.22</b> | <b>0.20</b> | $F = 35.30, P = 0.0001$    |
| <i>Xanthomonas</i>            | 1.90  | <b>0.08</b> | <b>0.18</b> | $F = 18.99, P = 0.001$     |

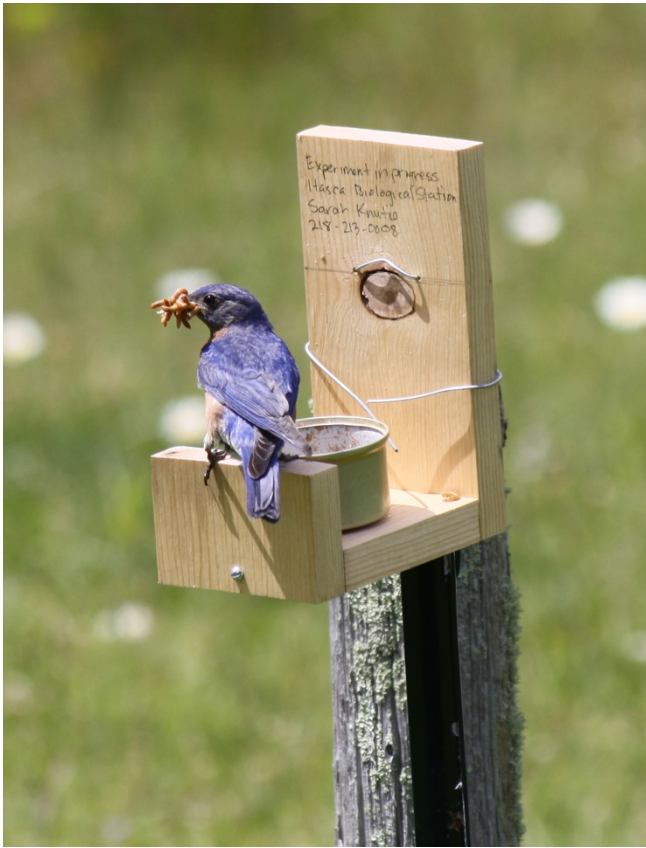

Fig. S1. Experimental mealworm feeder being used by a male eastern bluebird.
